# Supplementary material for: Phosphorus recovery by a novel electrochemical process integrating siderite and calcite: Efficacy, mechanism and optimization
Source: Research Square preprint supplement (doi:10.21203/rs.3.rs-7817880/v1), 2025-10-29
Supplement: Supplementary file 1 [file 0fecb006fa8623a22f2292b7.docx]

***Supporting Information for:***

**Phosphorus recovery by a novel electrochemical process integrating siderite and calcite: Efficacy, mechanism and optimization**

Ran Maob,c, Ziyu Zhangb,c, Jingwei Haoa*, Jiawei Tanga, Weiyue Dangb,c, Xu Zhaob,c

aNational Institute of Low Carbon and Clean Energy, State Key Laboratory of Water Resource Protection and Utilization in Coal Mining, Beijing 102211, P.R. China

bKey Laboratory of Environmental Aquatic Chemistry, State Key Laboratory of Regional Environment and Sustainability, Research Center for Eco-Environmental Sciences, Chinese Academy of Sciences, Beijing 100085, P.R. China

cUniversity of Chinese Academy of Sciences, Beijing 100049, P.R. China

*Corresponding author: Tel.: +86-10-57595677;

E-mail address: haojingweii@163.com

**
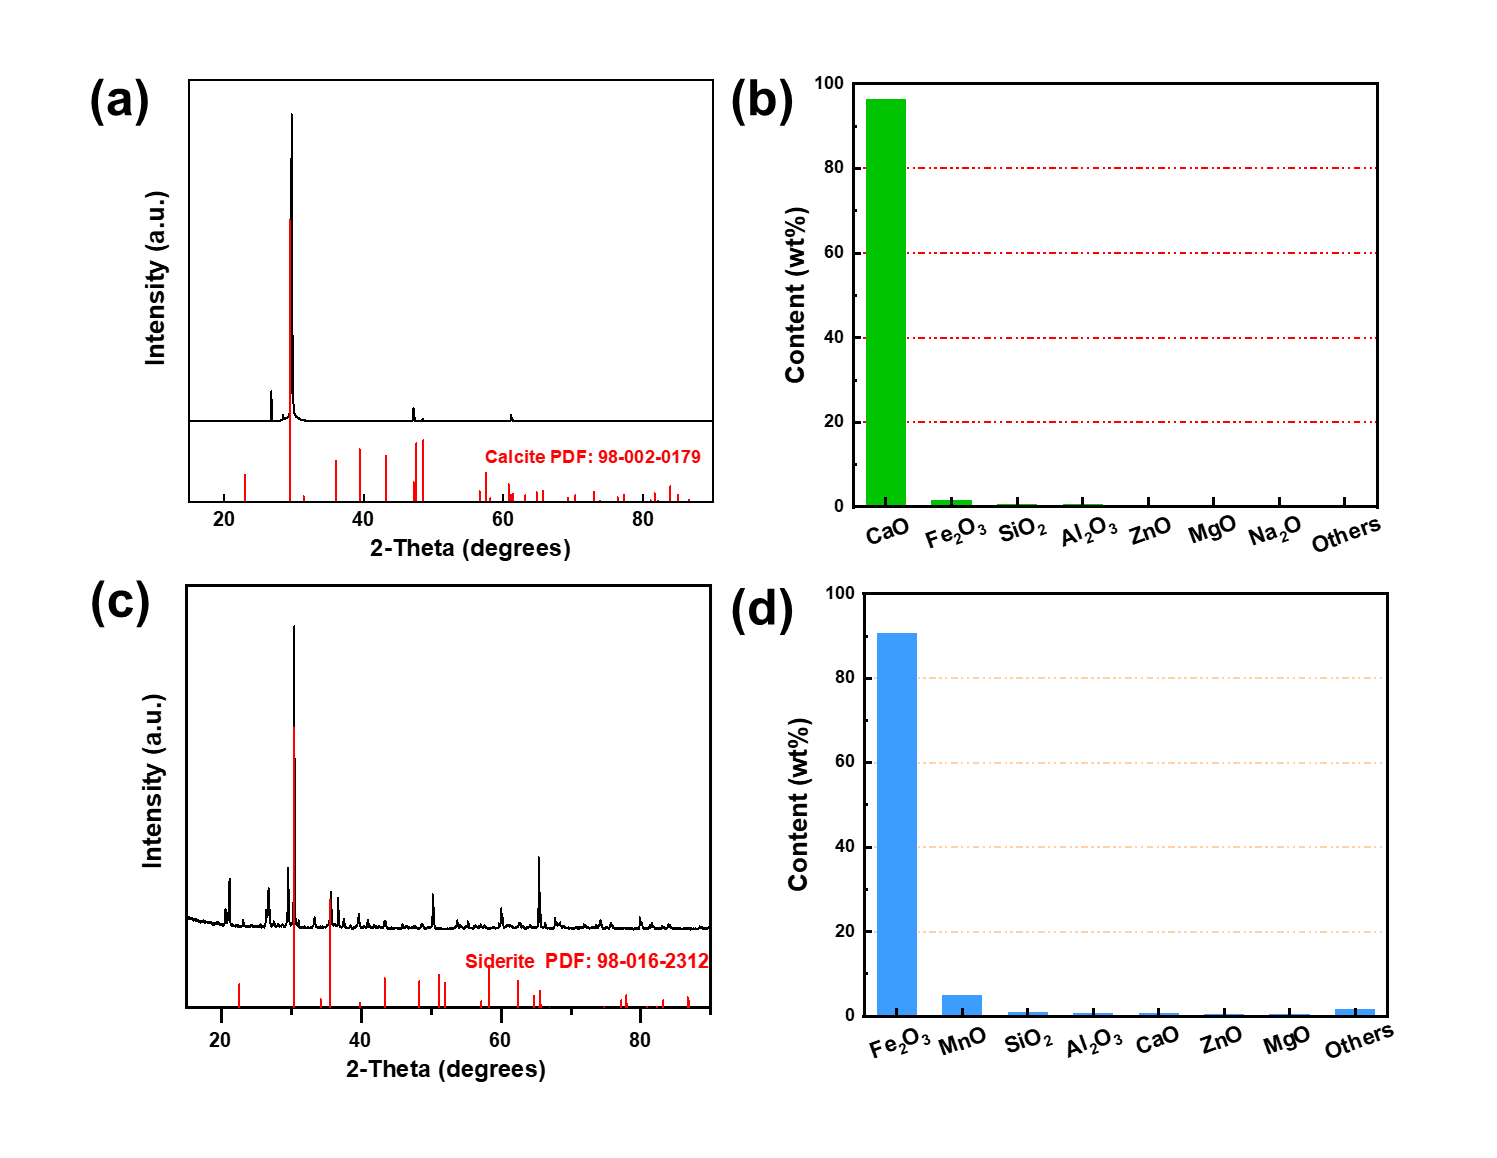
Fig. S1.** (a) XRD pattern of calcite, (b) XRF pattern of calcite, (c) XRD pattern of siderite, (d) XRF pattern of siderite.


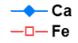
**
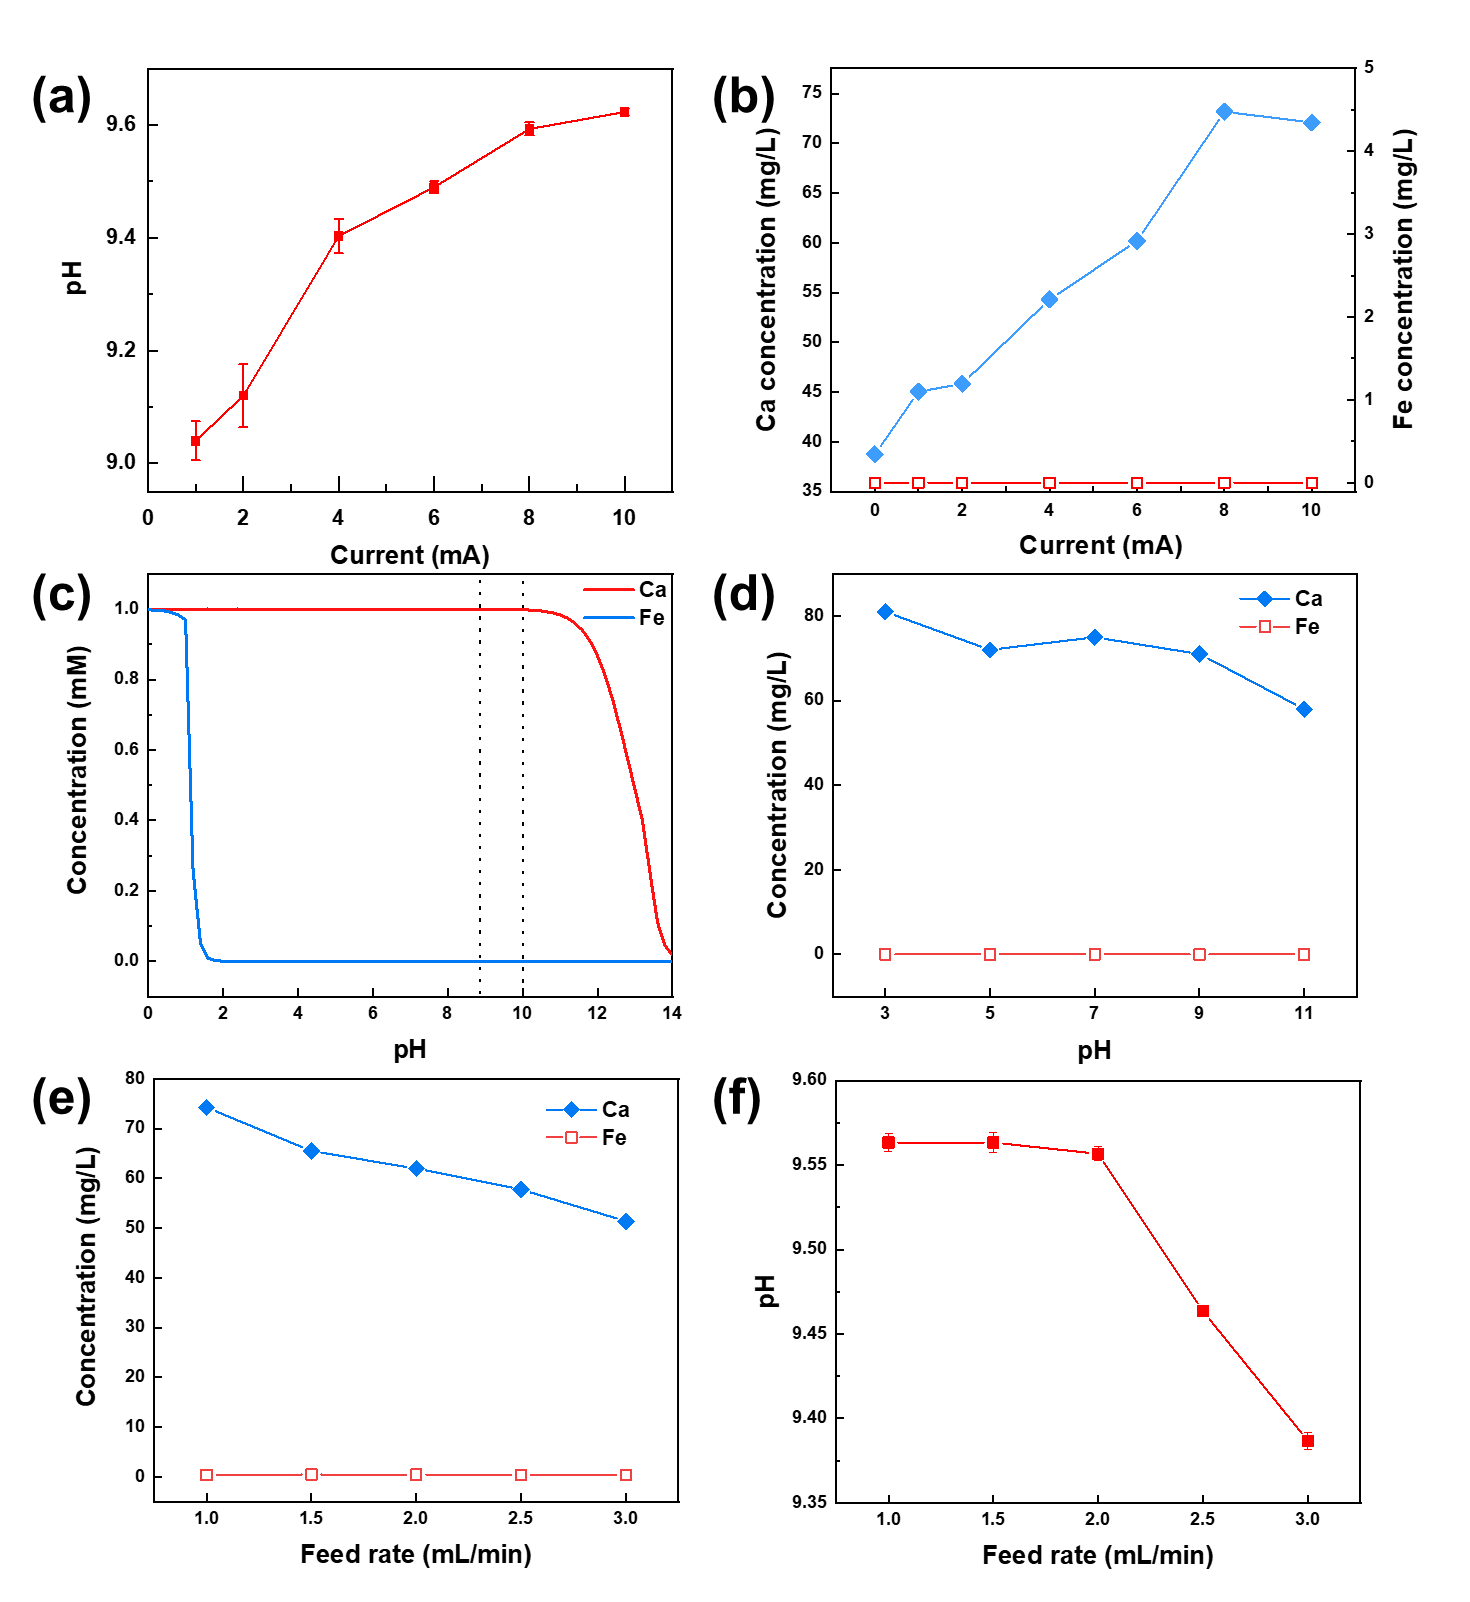
Fig. S2.** (a) Effect of current on the effluent pH and (b) metal ions concentration. (c) Distribution of calcite and iron species in aqueous solution at different pH. (d) Effect of initial pH on metal ions concentration in the effluent. (e) Effect of feed rate on metal ions concentration and (f) pH in the effluent.

**
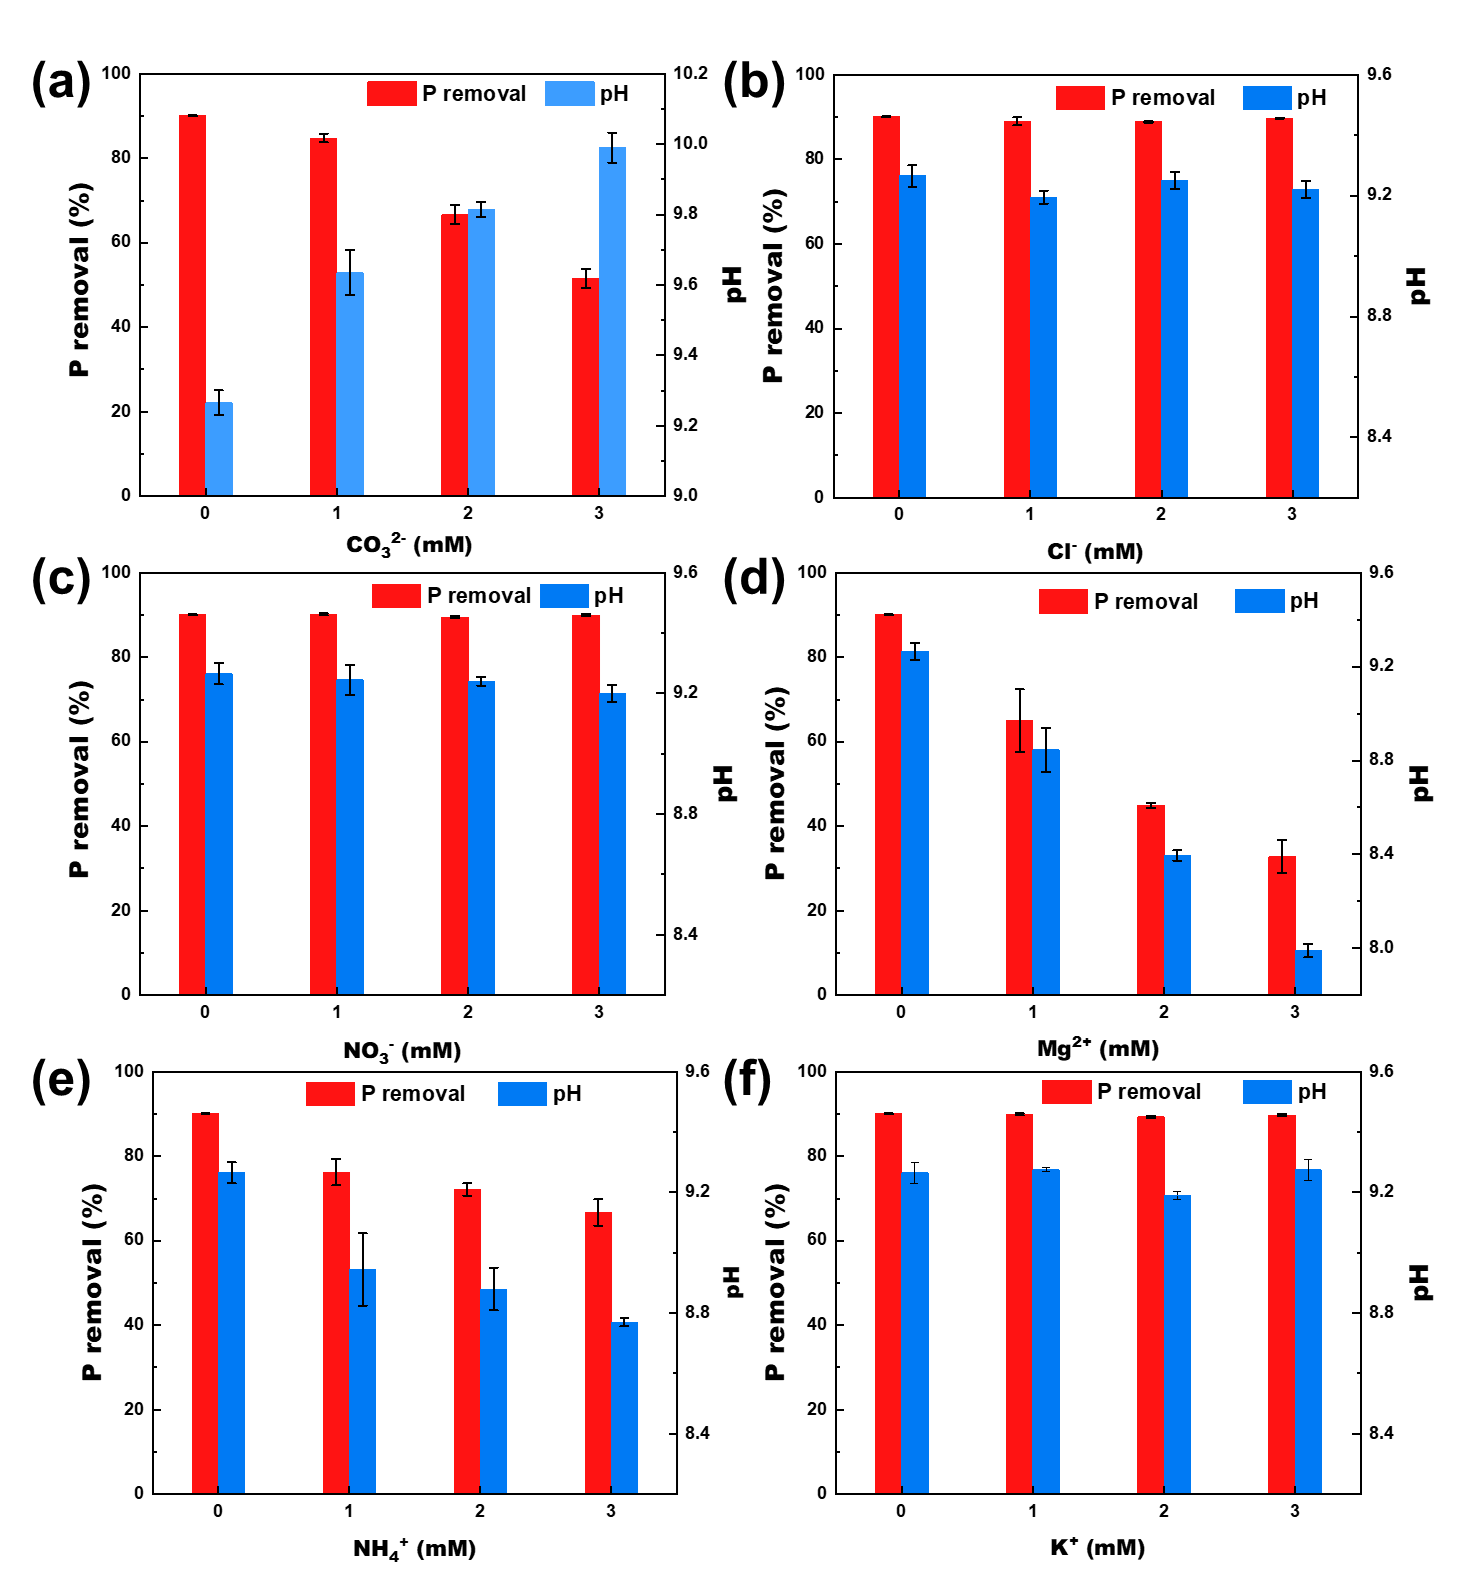
Fig. S3.** Effect of competing anions (a) CO32−, (b) Cl−, (c) NO3−, (d) Mg2+, (e) NH4+, (f) K+ on removal of PO43−.





**Fig. S4.** Premoval rate of real urine at different current densities with the feed rate of 1, 2, and 3 mL/min.

**Table S1.** Summary of XRD results

| Sample | Compound | Chemical formula | PDF |
| --- | --- | --- | --- |
| Calcite | Calcium carbonate | CaCO3 | 00-005-0586 |
| Calcite adsorption | Calcite | CaCO3 | 98-015-8258 |
| Calcite electrochem. | Calcite | CaCO3 | 98-004-0546 |
|  | Tricalcium Bisphosphate | Ca3O8P2 | 98-008-9320 |
|  | Iron phosphate | FePO4 | 98-041-2738 |
| Siderite | siderite | FeCO3 | 98-010-0678 |
| Siderite adsorption | siderite | FeCO3 | 98-010-0678 |
|  | Iron phosphate | FePO4 | 98-009-2199 |
| Siderite electrochem. | siderite | FeCO3 | 98-010-0678 |
|  | Iron phosphate | FePO4 | 98-016-8184 |
|  | Anapaite | H8Ca2FeO12P2 | 98-002-7721 |
|  | Cal. Pho.Oxi.Hyd. | HCa10O17P4 | 98-009-7010 |

**Table S2.** Fitting parameters of Ca 2p peak of calcite and siderite.

| Samples | | Peak | FWHM (eV) | Binding energy (eV) |
| --- | --- | --- | --- | --- |
| Calcite | Fresh | Ca2p3/2 | 1.42 | 346.74 |
|  | Ca2p1/2 | 1.42 | 350.23 |
|  | Satellite | 0.91 | 353.88 |
|  | Satellite | 1.11 | 358.54 |
| Adsorption | Ca2p3/2 | 1.54 | 347.08 |
|  | Ca2p1/2 | 1.54 | 350.58 |
|  | Satellite | 0.96 | 355.09 |
|  | Satellite | 1.11 | 358.73 |
| Electrochemical | Ca2p3/2 | 1.65 | 347.08 |
|  | Ca2p1/2 | 1.65 | 350.58 |
|  | Satellite | 1.05 | 355.06 |
|  | Satellite | 1.13 | 358.68 |
| Siderite | Fresh | Ca2p3/2 | 1.61 | 347.33 |
|  | Ca2p1/2 | 1.61 | 231.51 |
|  | Satellite | - | - |
| Adsorption | Ca2p3/2 | 2.48 | 347.35 |
|  | Ca2p1/2 | 2.48 | 350.85 |
|  | Satellite | 4.12 | 354.21 |
| Electrochemical | Ca2p3/2 | 1.79 | 347.41 |
|  | Ca2p1/2 | 1.79 | 350.91 |
|  | Satellite | - | - |

**Table S3.** Fitting parameters of Fe 2p peak of calcite and siderite.

| Samples | | Peak | FWHM (eV) | Binding energy (eV) |
| --- | --- | --- | --- | --- |
| Calcite | Fresh | - | - | - |
| Adsorption | - | - | - |
| Electrochemical | Fe-O-P | 2.92 | 712.8 |
|  | Fe-O | 2.43 | 711.06 |
| Siderite | Fresh | Fe(Ⅲ) | 2.69 | 711.81 |
|  | Fe(Ⅱ) | 2.32 | 710.20 |
| Adsorption | Fe(Ⅲ) | 2.77 | 712.02 |
|  | Fe(Ⅱ) | 2.37 | 710.19 |
| Electrochemical | Fe-O-P | 2.95 | 712.79 |
|  | Fe-O | 2.67 | 710.50 |

**Table S4.** Fitting parameters of O 1s peak of calcite and siderite.

| Samples | | Peak | FWHM (eV) | Binding energy (eV) | Percentage (%) |
| --- | --- | --- | --- | --- | --- |
| Calcite | Fresh | M-O | 1.45 | 531.25 | 93.4 |
|  | -OH | 1.27 | 532.55 | 6.6 |
| Adsorption | M-O | 1.38 | 531.29 | 36.9 |
|  | -OH/O-P | 1.46 | 532.07 | 26.4 |
|  | H2O | 1.49 | 533.2 | 36.7 |
| Electrochemical | M-O | 1.6 | 531.21 | 60.2 |
|  | M-O-P | 1.73 | 532.22 | 31.9 |
|  | H2O | 1.27 | 533.49 | 7.9 |
| Siderite | Fresh | M-O | 1.65 | 529.92 | 19.1 |
|  | -OH | 1.40 | 531.62 | 59.1 |
|  | H2O | 1.29 | 532.81 | 21.8 |
| Adsorption | M-O | 1.41 | 529.89 | 15.2 |
|  | M-O-P | 1.51 | 531.76 | 66.4 |
|  | H2O | 1.52 | 533.11 | 18.4 |
| Electrochemical | M-O | 1.72 | 530.17 | 21.1 |
|  | M-O-P | 1.52 | 531.74 | 46.8 |
|  | H2O | 1.76 | 532.98 | 32.1 |

**Table S5.** Fitting parameters of P 2p peak of calcite and siderite.

| Samples | | Peak | FWHM (eV) | Binding energy (eV) | Percentage (%) |
| --- | --- | --- | --- | --- | --- |
| Calcite | Fresh | - | - | - | - |
|  | - | - | - | - |
| Adsorption | Ca-P | 1.26 | 132.90 | 53.8 |
|  | Fe-P | 1.27 | 133.87 | 46.2 |
| Electrochemical | Ca-P | 1.38 | 132.91 | 54.1 |
|  | Fe-P | 1.37 | 133.84 | 45.9 |
| Siderite | Fresh | - | - |  | - |
|  | - | - |  | - |
| Adsorption | Ca-P | 0.5 | 132.55 | 32.1 |
|  | Fe-P | 0.85 | 133.56 | 67.9 |
| Electrochemical | Ca-P | 1.08 | 132.88 | 58.1 |
|  | Fe-P | 1.17 | 133.81 | 41.9 |

**Table S6.** RSM Experimental Design

| Run | Pattern | Current  (mA) | Feed rate  (mL/min) | pH |
| --- | --- | --- | --- | --- |
| 1 | 000 | 5.5 | 2 | 6 |
| 2 | +0− | 10 | 2 | 3 |
| 3 | 000 | 5.5 | 2 | 6 |
| 4 | −−0 | 1 | 1 | 6 |
| 5 | 0++ | 5.5 | 3 | 9 |
| 6 | +−0 | 10 | 1 | 6 |
| 7 | −0− | 1 | 2 | 3 |
| 8 | −0+ | 1 | 2 | 9 |
| 9 | ++0 | 10 | 3 | 6 |
| 10 | 0−− | 5.5 | 1 | 3 |
| 11 | 000 | 5.5 | 2 | 6 |
| 12 | −+0 | 1 | 3 | 6 |
| 13 | +0+ | 10 | 2 | 9 |
| 14 | 0+− | 5.5 | 3 | 3 |
| 15 | 0−+ | 5.5 | 1 | 9 |

**Table S7.** ANOVA results for the Response Surface Quadratic model after variable normalization.

| Item | df | Sum of squares | Mean square | F Value | p-value |
| --- | --- | --- | --- | --- | --- |
| P removal | | | | | |
| Model | 8 | 12399.362 | 1549.92 | 63.228 | <.0001 |
| current(1,10) | 1 | 3907.28 | 3907.28 | 159.395 | <.0001 |
| feed rate(1,3) | 1 | 1158.008 | 1158.008 | 47.2402 | 0.0005 |
| pH(3,9) | 1 | 3652.988 | 3652.988 | 149.0213 | <.0001 |
| current*pH | 1 | 284.7656 | 284.766 | 11.6168 | 0.0143 |
| feed rate*pH | 1 | 416.16 | 416.16 | 16.977 | 0.0062 |
| current*current | 1 | 209.5426 | 209.543 | 8.5482 | 0.0265 |
| feed rate*feed rate | 1 | 363.4078 | 363.408 | 14.825 | 0.0085 |
| pH*pH | 1 | 2661.042 | 2661.042 | 108.5555 | <.0001 |
| Error | 6 | 147.079 | 24.51 | 24.51 |  |
| R-Squared | 0.9882 | |  |  |  |
| Adj R-Squared | 0.9726 | |  |  |  |
| RMSE | 4.951 | |  |  |  |
| Electrochemical energy consumption | | | | | |
| Model | 7 | 119045.48 | 17006.5 | 6.8655 | 0.0105 |
| current(1,10) | 1 | 12402.34 | 12402.34 | 5.0068 | 0.0603 |
| feed rate(1,3) | 1 | 7928.553 | 7928.55 | 3.2007 | 0.1167 |
| pH(3,9) | 1 | 47592.3 | 47592.3 | 19.2128 | 0.0032 |
| feed rate*pH | 1 | 6282.94 | 6282.94 | 2.5364 | 0.1553 |
| current*current | 1 | 8718.093 | 8718.09 | 3.5195 | 0.1028 |
| feed rate*feed rate | 1 | 10644.83 | 10644.83 | 4.2973 | 0.0769 |
| pH*pH | 1 | 23823.65 | 23823.65 | 9.6175 | 0.0173 |
| Error | 7 | 17339.76 | 2477.1 |  |  |
| R-Squared | 0.8728 | |  |  |  |
| Adj R-Squared | 0.7457 | |  |  |  |
| RMSE | 49.77 | |  |  |  |

**Table S8.** Regression Coefficients of the Predicted Quadratic Polynomial Model

| Item | Estimate | Standard error | t value | p value |
| --- | --- | --- | --- | --- |
| P removal |  |  |  |  |
| Intercept | 72.06667 | 2.858507 | 25.21 | <.0001 |
| current(1,10) | 22.1 | 1.750471 | 12.63 | <.0001 |
| feed rate(1,3) | -12.0313 | 1.750471 | -6.87 | 0.0005 |
| pH(3,9) | 21.36875 | 1.750471 | 12.21 | <.0001 |
| current*pH | 8.4375 | 2.47554 | 3.41 | 0.0143 |
| feed rate*pH | -10.2 | 2.47554 | -4.12 | 0.0062 |
| current*current | -7.53333 | 2.576624 | -2.92 | 0.0265 |
| feed rate*feed rate | -9.92083 | 2.576624 | -3.85 | 0.0085 |
| pH*pH | -26.8458 | 2.576624 | -10.42 | <.0001 |
| Electrochemical energy consumption | |  |  |  |
| Intercept | 44.53333 | 28.73505 | 1.55 | 0.1651 |
| current(1,10) | 39.37375 | 17.59655 | 2.24 | 0.0603 |
| feed rate(1,3) | -31.4813 | 17.59655 | -1.79 | 0.1167 |
| pH(3,9) | -77.13 | 17.59655 | -4.38 | 0.0032 |
| feed rate*pH | 39.6325 | 24.88528 | 1.59 | 0.1553 |
| current*current | -48.5917 | 25.90142 | -1.88 | 0.1028 |
| feed rate*feed rate | 53.69333 | 25.90142 | 2.07 | 0.0769 |
| pH*pH | 80.32583 | 25.90142 | 3.1 | 0.0173 |
